# Supplementary material for: Evaluation of Image Quality of Temporal Maximum Intensity Projection and Average Intensity Projection of Adaptive 4D Spiral CT Scans: A Phantom Study
Source: Research Square preprint supplement (doi:10.21203/rs.3.rs-5148491/v1), 2024-10-22

Supplemental file

Figure S1. Noise power spectrum (NPS) of temporal maximum intensity projection and average intensity projection summing varying phases (2 to 10 phases).

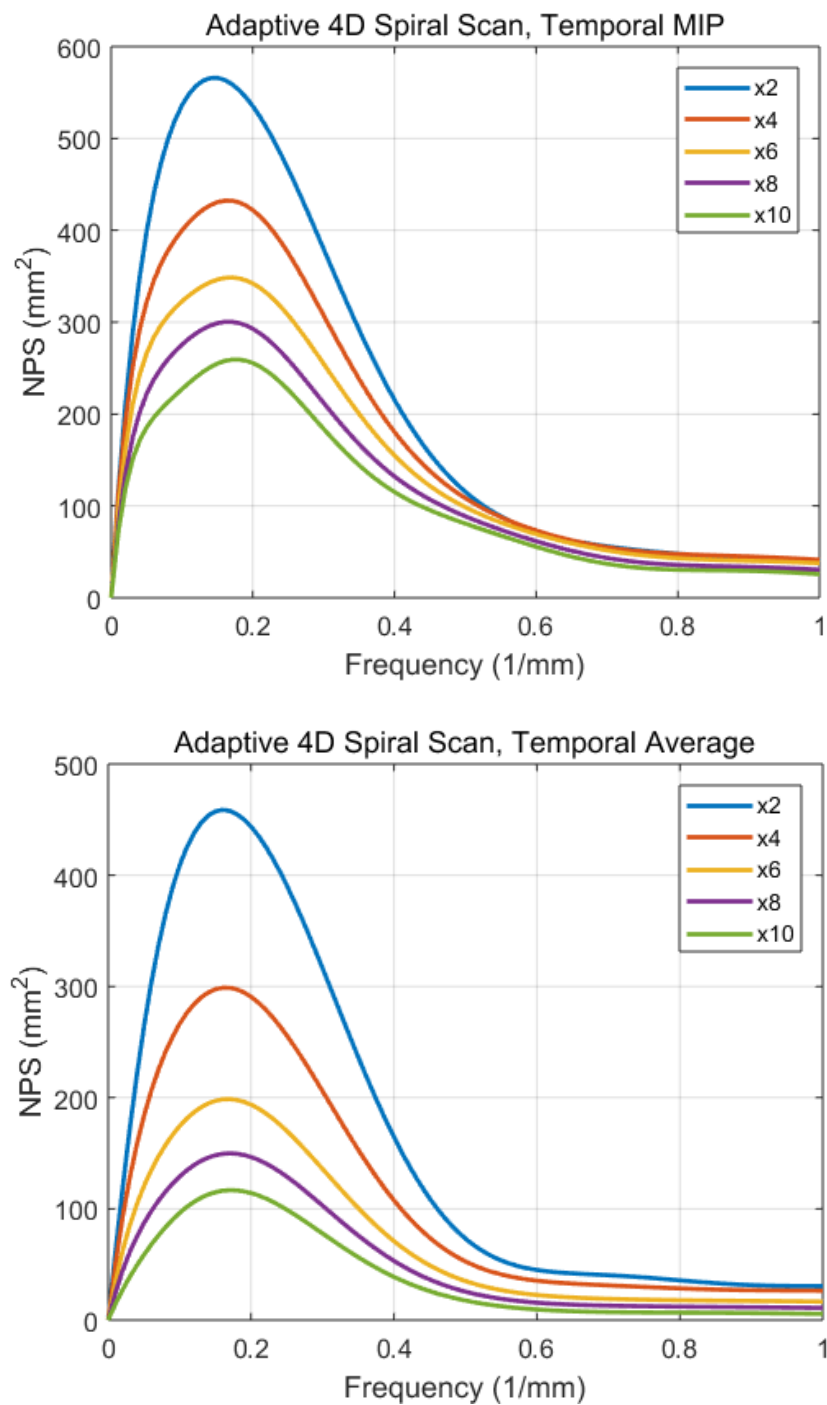

Supplement: Supplementary file 1 [file 3a14f21a4e1dc5568075ca33.pdf]
